# Supplementary material for: Robust, anti-fatigue, and self-healing graphene oxide/hydrophobically associated composite hydrogels and their use as recyclable adsorbents for dye wastewater treatment
Source: Royal Society of Chemistry journal article supplement (doi:10.1039/c5ta04470g), 2015-01-01
Supplement: c5ta04470g1.pdf [file c5ta04470g1.pdf]

## **Supplementary information**

### **Robust, anti-fatigue, and self-healing graphene oxide/hydrophobically associated composite hydrogels and their use as recyclable adsorbents for dye wastewater treatment**

Wei Cui, Jin Ji, Yi-Feng Cai, Hang Li and Rong Ran\*

College of Polymer Science and Engineering, State Key Laboratory of Polymer

Materials Engineering, Sichuan University, Chengdu, 610065, China

\*Corresponding author. Email address: ranrong@scu.edu.cn

Tel: +86-28-85462890, Fax: +86-28-85462890

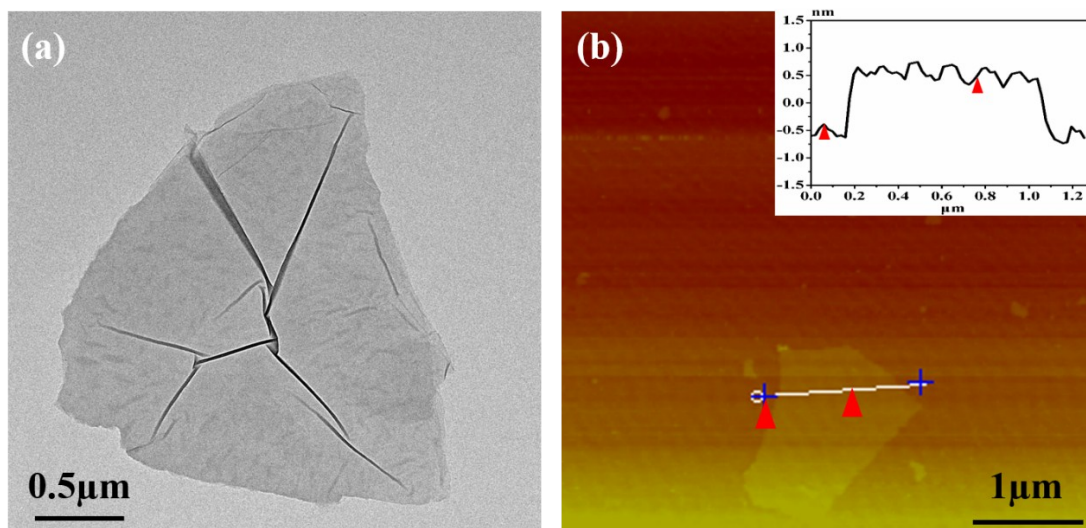

**Fig. S1** TEM (a) and AFM (b) of GO.

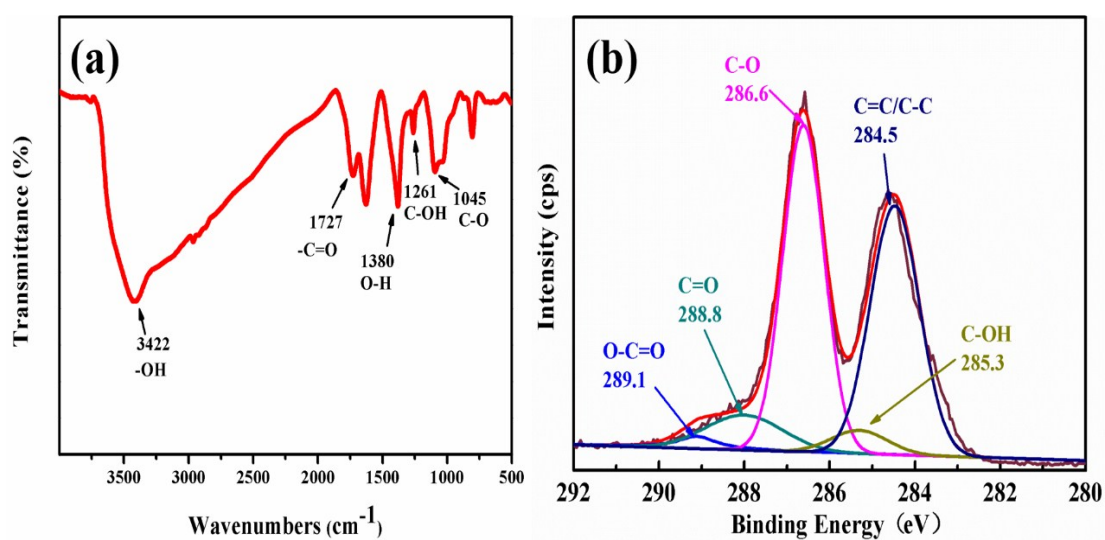

**Fig. S2** FTIR spectrum (a) and C1s XPS spectra (b) of GO.

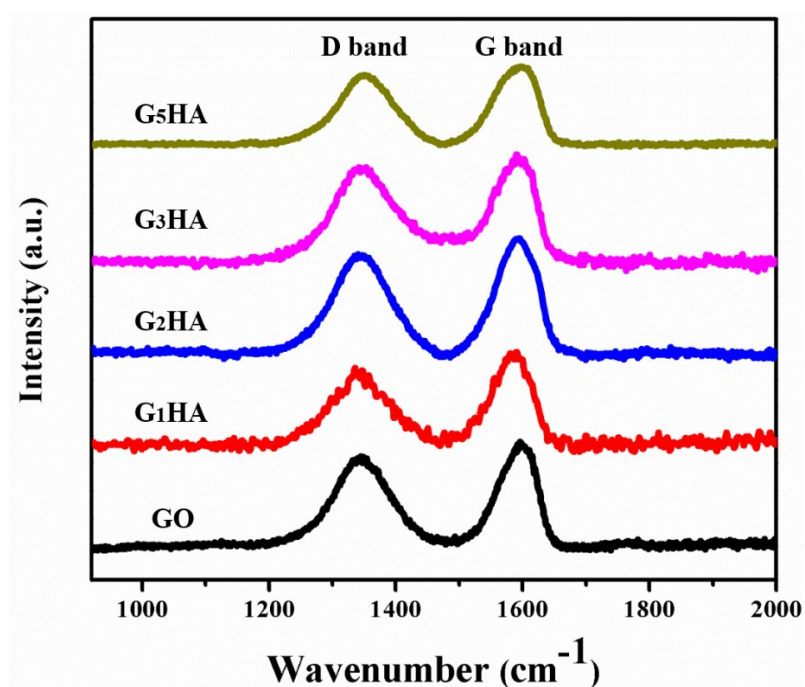

Fig. S3 Raman spectra of GO and GHA gels.

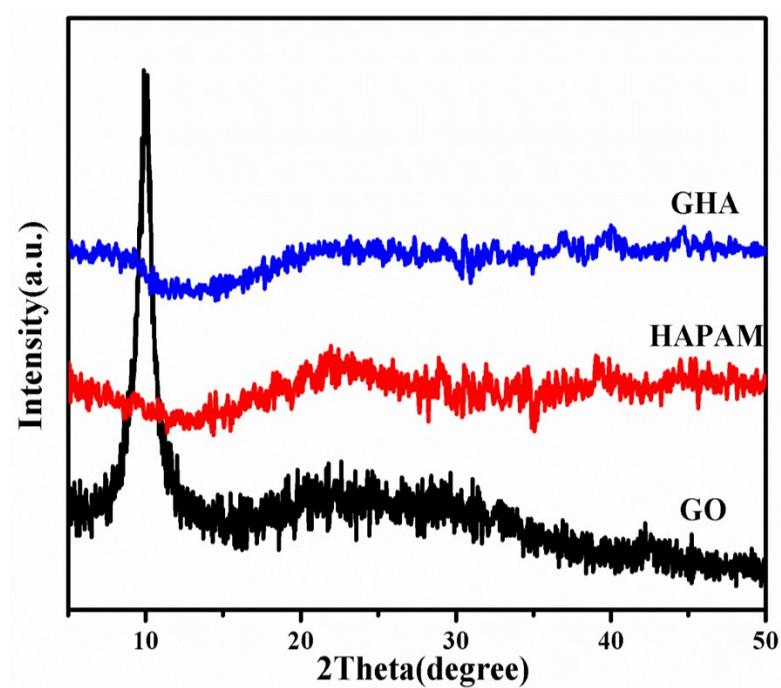

Fig. S4 XRD patterns of GO, HAPAM and GHA.

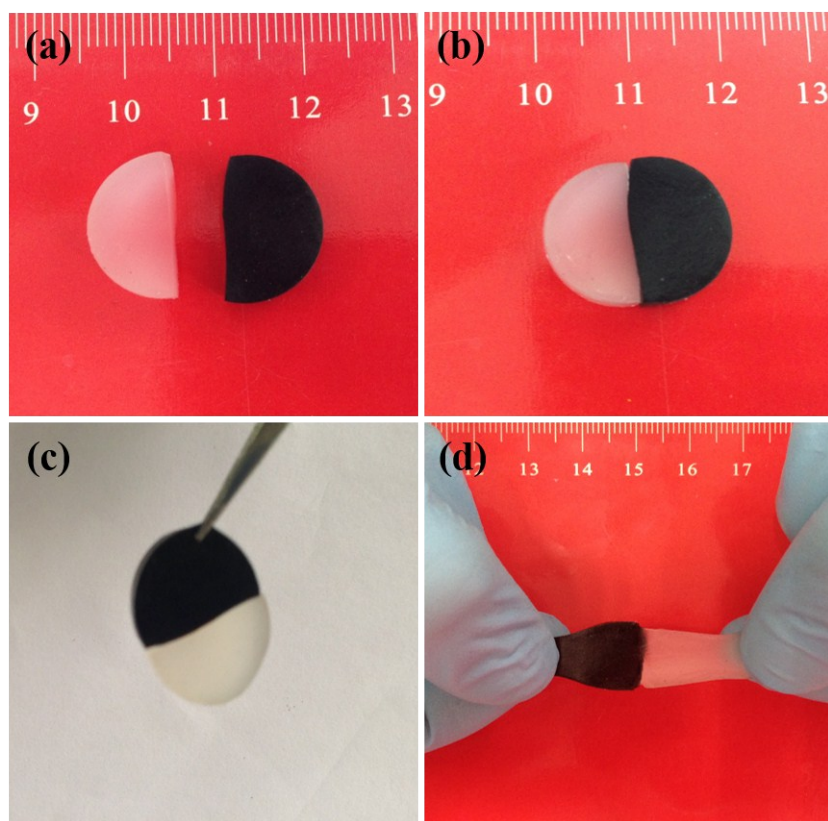

**Fig. S5** Preparation of hybrid hydrogel with heterogeneous mechanical properties. Semicircular hydrogel samples of HAPAM and G<sub>5</sub>HA (a) were joined (b) to heal into a hybrid hydrogel (c), which exhibited distinct elastic properties upon stretching (d).

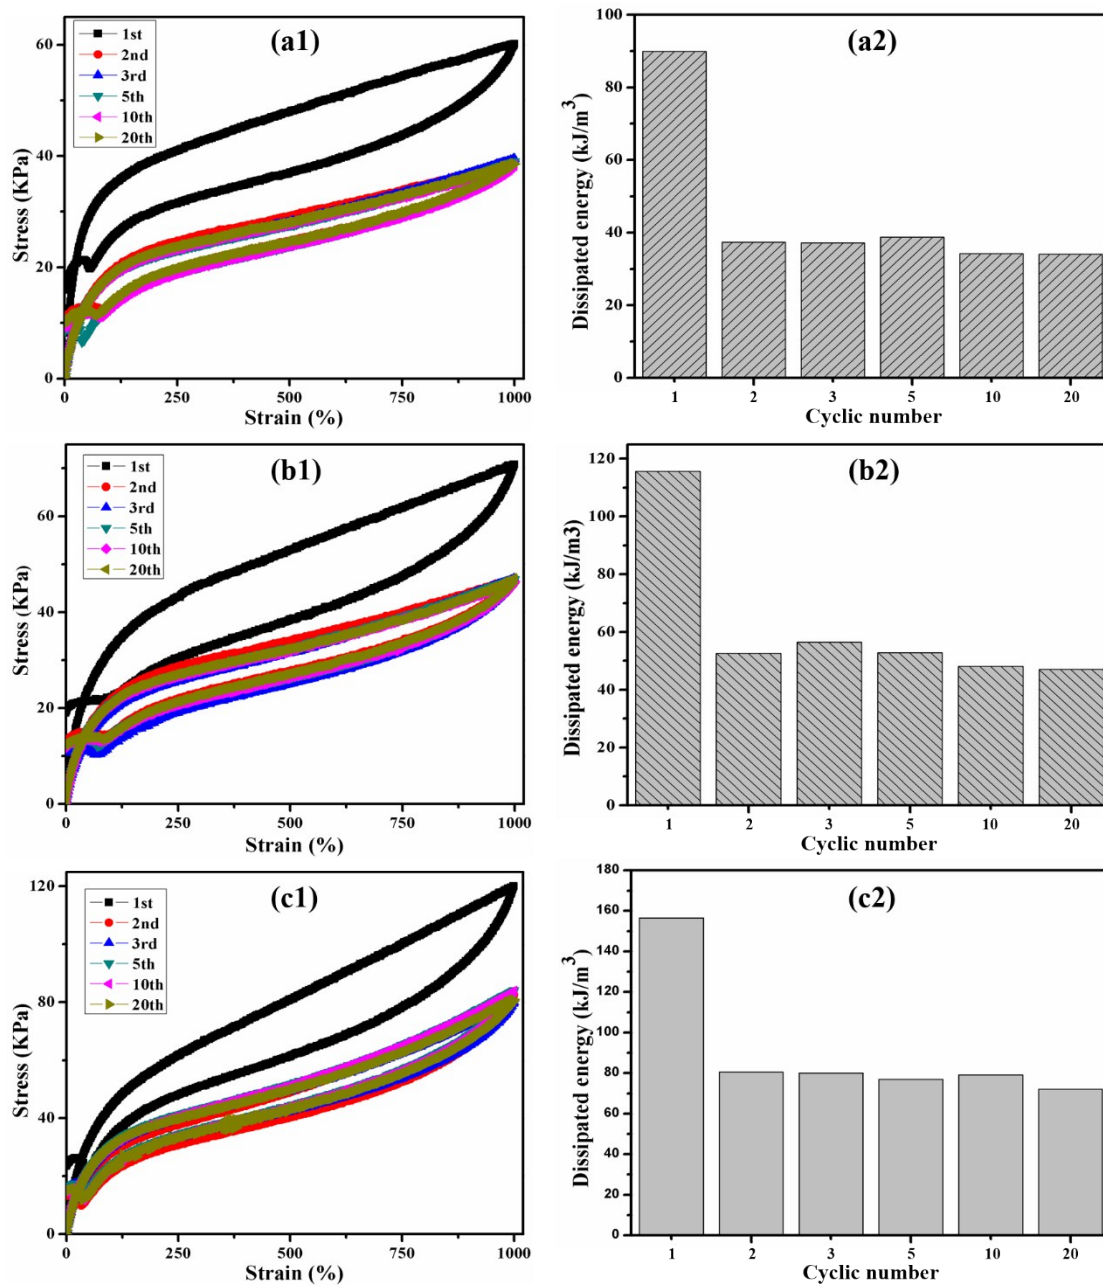

**Fig. S6** Cyclic tensile loading-unloading curves of several selected cycles on G<sub>1</sub>HA (a1), G<sub>2</sub>HA (b1) and G<sub>3</sub>HA (c1) at a maximum strain of 1000%. 10 min recovery was allowed for each same gel specimen after the former loading. Dissipated energies of G<sub>1</sub>HA (a2), G<sub>2</sub>HA (b2) and G<sub>3</sub>HA (c2) were calculated from their loading-unloading curves.



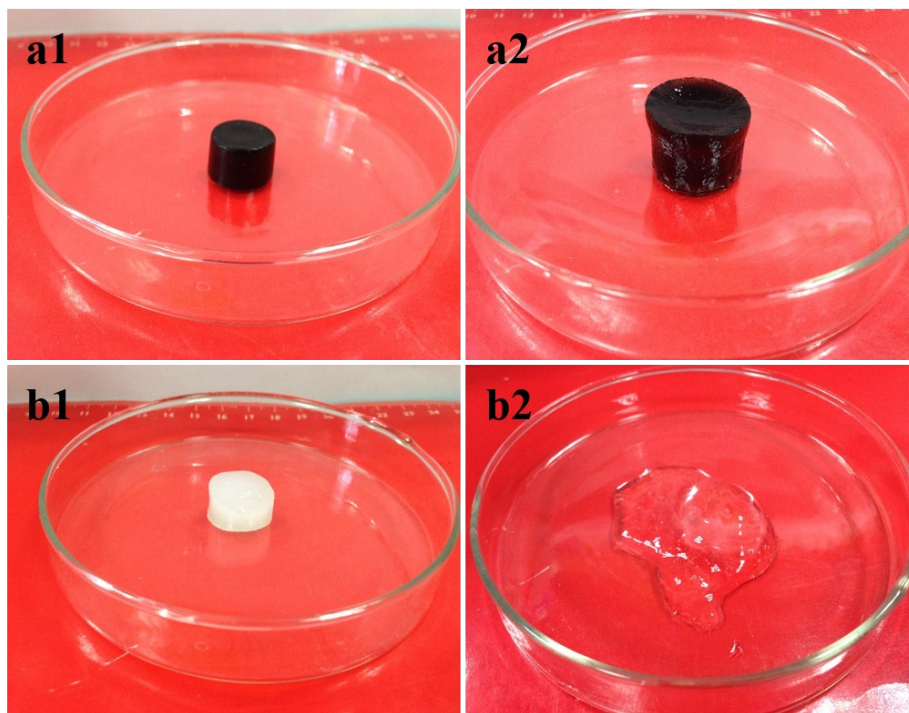

**Fig. S7** Photographs of original G<sub>5</sub>HA (a1) and HAPAM (b1) consecutively swelling for another month after achieving equilibrium swelling state. G<sub>5</sub>HA (a2) remained to be an integrated columnar hydrogel while HAPAM (b2) disintegrated.
